# Supplementary material for: The role of the intrinsic pathway of apoptosis in human ejaculated sperm damage under a state of scrotal heat stress
Source: PubMed Central journal article supplement (PMC10789687; doi:10.1007/s10815-023-02992-9), 2023-12-08
Supplement: 10815_2023_2992_MOESM1_ESM.pdf [file 10815_2023_2992_MOESM1_ESM.pdf]

**Supplementary Table 1.** Descriptive statistics of clinical and standard semen parameters

| Standard semen parameter                         | Fertile men                                      | Professional drivers                          | Infertile men with varicocele                 | Infertile men not exposed to genital heat stress |
|--------------------------------------------------|--------------------------------------------------|-----------------------------------------------|-----------------------------------------------|--------------------------------------------------|
| Age (years)                                      | 33.00 (23.00–41.00)<br>32.93 ± 5,50<br>n=29      | 33.00 (23,00–41.00)<br>32.57 ± 4.55<br>n=54   | 31.00 (20.00–41.00)<br>30.78 ± 4.64<br>n=78   | 33.00 (25.00–41.00)<br>32.89 ± 4.11<br>n=37      |
| BMI (kg/m <sup>2</sup> )                         | 25.79 (20.78–31.92)<br>26.15 ± 3.25<br>n=28      | 26.30 (21,31–31.00)<br>26.30 ± 2.90<br>n=44   | 24.73 (19.57–32.42)<br>24.85 ± 2.88<br>n=70   | 25.92 (20.57–32.32)<br>26.28 ± 3.29<br>n=24      |
| Semen volume (mL)                                | 2.95 (0.80–6.80)<br>3.15 ± 1.39<br>n=29          | 3.00 (1.00–7.50)<br>3.37 ± 1.44<br>n=54       | 3.00 (0.90–8.40)<br>3.3 ± 1.66<br>n=78        | 3.30 (0.80–6.30)<br>3.49 ± 1.36<br>n=37          |
| Semen pH                                         | 8.00 (7.50–9.00)<br>8.18 ± 0,39<br>n=27          | 8.00 (7.50–8.50)<br>8.20 ± 0.30<br>n=44       | 8.00 (7.50–9.00)<br>8.22 ± 0.28<br>n=69       | 8.00 (7.50–8.50)<br>8.17 ± 0.30<br>n=32          |
| Sperm concentration (×10 <sup>6</sup> /mL)       | 79.45 (15.50–283.00)<br>102.54 ± 66.32<br>n=29   | 22.54 (0,22–178.00)<br>33.88 ± 31.86<br>n=54  | 22.00 (0.20–173.50)<br>33.28 ± 33.66<br>n=78  | 15.00 (0.03–227.00)<br>29.23 ± 44.34<br>n=37     |
| Total sperm number (×10 <sup>6</sup> /ejaculate) | 252.90 (64.80–608.00)<br>286.89 ± 157.46<br>n=29 | 57.47 (1.01–712.00)<br>98.69 ± 118.17<br>n=54 | 62.80 (0.44–537.80)<br>97.69 ± 103.81<br>n=78 | 41.40 (0.08–454.00)<br>84.66 ± 109.29<br>n=37    |
| Progressive motility (%)                         | 51.00 (23.00–70.00)<br>50.43 ± 11.90<br>n=29     | 40.00 (9.00–72.00)<br>39.30 ± 17.24<br>n=54   | 39.00 (0.00–73.00)<br>37.63 ± 15.80<br>n=78   | 33.00 (0.00–63.00)<br>29.94 ± 17.32<br>n=37      |
| Total sperm motility (%)                         | 61.00 (32.00–78.00)<br>59.07 ± 11.5<br>n=29      | 48.50 (12.00–77.00)<br>46.94 ± 16.92<br>n=54  | 48.00 (0.00–79.00)<br>46.40 ± 16.26<br>n=78   | 44.00 (0.00–72.00)<br>38.86 ± 19.88<br>n=37      |
| Viability – eosin test (%)                       | 75.50 (50.00–93.00)<br>74.50 ± 11.63<br>n=29     | 68.00 (44.00–91.00)<br>69.15 ± 12.21<br>n=54  | 75.00 (22.00–96.00)<br>71.73 ± 13.20<br>n=77  | 68.00 (15.00–86.00)<br>63.08 ± 19.18<br>n=35     |
| Normal morphology (%)                            | 4.00 (1.00–15.00)<br>4.39 ± 2,98<br>n=29         | 2.00 (0.00–10.00)<br>2.05 ± 1.98<br>n=54      | 2.00 (0.00–7.00)<br>2.00 ± 1.69<br>n=78       | 2.00 (0.00–11.00)<br>2.00 ± 2.12<br>n=35         |

|                                                            |                                                 |                                                 |                                                  |                                                  |
|------------------------------------------------------------|-------------------------------------------------|-------------------------------------------------|--------------------------------------------------|--------------------------------------------------|
| Peroxidase-positive leukocytes ( $\times 10^6/\text{mL}$ ) | 0.13 (0.00–1.90)<br>0.33 $\pm$ 0,51<br>n=27     | 0.12 (0.00–1.76)<br>0.32 $\pm$ 0.4<br>n=53      | 0.09 (0.00–6.80)<br>0.54 $\pm$ 1.17<br>n=77      | 0.05 (0.00–6.56)<br>0.64 $\pm$ 1.41<br>n=37      |
| Round cells ( $\times 10^6/\text{mL}$ )                    | 0.80 (0.26–5.32)<br>1.53 $\pm$ 1,32<br>n=27     | 0.75 (0.00–12.00)<br>1.59 $\pm$ 2.51<br>n=53    | 0.82 (0.00–8.50)<br>1.46 $\pm$ 1.65<br>n=77      | 0.70 (0.00–6.90)<br>1.31 $\pm$ 1.54<br>n=37      |
| Viability – HOS test (%)                                   | 74.50 (57.00–93.00)<br>74.58 $\pm$ 8,57<br>n=24 | 66.50 (19.00–91.00)<br>63.31 $\pm$ 16.2<br>n=48 | 65.00 (29.00–94.00)<br>63.83 $\pm$ 15.68<br>n=72 | 63.50 (25.00–88.00)<br>60.62 $\pm$ 16.71<br>n=25 |

Value are median (Min–Max) and mean  $\pm$  SD

HOS test – hypo-osmotic swelling test; n=number of participants for each variable
